# Supplementary material
Source: PubMed Central journal article supplement (PMC5054979)
Supplement: NIHMS800610-supplement-3.pdf [file NIHMS800610-supplement-3.pdf]

4  
5  
6

**Supplementary Table 2. List of antibodies/reagents used in the flow cytometry analysis**

| Target protein | Fluorochrome    | Clone   | Manufacturer      | Dilution                        |       |
|----------------|-----------------|---------|-------------------|---------------------------------|-------|
| CD27           | FITC            | M-T271  | Biolegend         | Manufacturer recommended volume |       |
| CD19           | PE              | HIB19   | Biolegend         |                                 |       |
| CD38           | PerCP           | HIT2    | Biolegend         |                                 |       |
| IgD            | PE-Cy7          | IA6-2   | Biolegend         |                                 |       |
| CD71           | APC or FITC     | CY1G4   | Biolegend         |                                 |       |
| CD3            | Alexa Fluor 700 | HIT3a   | Biolegend         |                                 |       |
| CD20           | APC-Cy7         | 2H7     | Biolegend         |                                 |       |
| TLR10          | PE              | 3C10C5  | Biolegend         |                                 |       |
| CD14           | Alexa Fluor 700 | HCD14   | Biolegend         |                                 |       |
| CD16           | Alexa Fluor 700 | 3G8     | Biolegend         |                                 |       |
| CD52           | PE              | HI186   | Biolegend         |                                 |       |
| Pax5           | Alexa Fluor 488 | 1H9     | Biolegend         |                                 | 1:400 |
| IRF4           | FITC            | 3E4     | eBioscience       |                                 | 1:250 |
| IRF8           | PerCP-eFluor710 | V3GYWCH | eBioscience       | 1:500                           |       |
| Streptavidin   | APC             |         | Life Technologies | 1:1000                          |       |
| Live/Dead      | Amcyan/ Aqua    |         | Invitrogen        | 1:100                           |       |

7  
8
